# Supplementary material for: Superior Gas Barrier Properties of Biodegradable PBST vs. PBAT Copolyesters: A Comparative Study
Source: MDPI journal article supplement (doi:10.3390/polym13193449), 2021-10-08
Supplement: s1 [file s1]

# Superior Gas Barrier Properties of Biodegradable PBST vs. PBAT Copolyesters: A Comparative Study

Pengkai Qin <sup>1,2</sup>, Linbo Wu <sup>1,2,\*</sup>, Bogeng Li <sup>2</sup>, Naixiang Li <sup>3</sup>, Xiaohu Pan <sup>3</sup> and Junming Dai <sup>3</sup>

<sup>1</sup> Key Laboratory of Biomass Chemical Engineering of Ministry of Education, College of Chemical and Biological Engineering, Zhejiang University, 38 Zheda Road, Hangzhou 310027, China; qinpk@zju.edu.cn

<sup>2</sup> State Key Laboratory of Chemical Engineering at ZJU, College of Chemical and Biological Engineering, Zhejiang University, 38 Zheda Road, Hangzhou 310027, China; bgli@zju.edu.cn

<sup>3</sup> Sinopec Research Institute of Yizheng Chemical Fiber Co., Ltd., Puxi Road, Yizheng 211900, China; linx.yzhx@sinopec.com (N.L.); panxh.yzhx@sinopec.com (X.P.); daijm.yzhx@sinopec.com (J.D.)

\* Correspondence: wulinbo@zju.edu.cn

## Supporting information

**Table S1.** PBAT gas barrier data reported in literature.

| Polymer | $x_c^a$ | $P_{O_2}^b$ | $P_{CO_2}^b$ | Test Conditions <sup>c</sup> | $P_{WV}^d$ | Test Conditions <sup>c</sup> | Source             |
|---------|---------|-------------|--------------|------------------------------|------------|------------------------------|--------------------|
| Ecoflex |         | 0.9         |              |                              |            |                              | Ref. <sup>1</sup>  |
| PBAT45  |         | 1.0         | 12.1         | 25/0                         | 365        | 38/90                        | Ref. <sup>2</sup>  |
| Ecoflex | 9.3     |             | 8.3          | 20/0                         | 285.4      | 30/53                        | Ref. <sup>3</sup>  |
| Ecoflex | 6.8     | 0.9         |              | 25/50                        | 348.4      | 25/100                       | Ref. <sup>4</sup>  |
| Ecoflex |         | 1.0         |              | 23/0                         | 333.5      | 38/90                        | Ref. <sup>5</sup>  |
| Ecoflex |         |             |              |                              | 479.7      | 25/75                        | Ref. <sup>6</sup>  |
| Ecoflex | 10.6    | 1.2         |              | 30/50                        |            |                              | Ref. <sup>7</sup>  |
| Ecoflex |         | 0.8         | 5.9          | 23/0                         | 308.2      | 38/90                        | Ref. <sup>8</sup>  |
| Ecoflex | 11.5    | 1.2         | 13.7         | 25/0                         |            |                              | Ref. <sup>9</sup>  |
| Ecoflex | 11.2    | 0.7         | 7.1          | 25/0                         |            |                              | Ref. <sup>10</sup> |
| PBG7070 | 9.0     |             |              |                              | 535.8      | 25/50                        | Ref. <sup>11</sup> |
| PBAT40  | 8.0     | 1.6         | 16.9         | 30/0                         |            |                              | Ref. <sup>12</sup> |

<sup>a</sup>: %. <sup>b</sup>: barrer (1barrer= $10^{-10}\text{cm}^3\cdot\text{cm}/(\text{cm}^2\cdot\text{s}\cdot\text{cmHg})$ ). <sup>c</sup>: °C/ %RH. <sup>d</sup>: g·mm/( $\text{m}^2\cdot\text{day}\cdot\text{atm}$ ).

**Table S2.** Gas permeability coefficients of some amorphous homopolyesters (PBS, PBA, PBT) and copolyesters (PBST45 and PBAT45) predicted by group contribution method.

| Sample | $P_{O_2}$ (barrer) <sup>a</sup> | $BIF_{O_2}$ <sup>b</sup> | $P_{CO_2}$ (barrer) <sup>a</sup> | $BIF_{CO_2}$ <sup>b</sup> |
|--------|---------------------------------|--------------------------|----------------------------------|---------------------------|
| PBA    | 1.39                            | 1.0                      | 6.26                             | 1.0                       |
| PBS    | 0.85                            | 1.6                      | 3.68                             | 1.7                       |
| PBT    | 0.29                            | 4.8                      | 1.15                             | 5.4                       |
| PBAT45 | 0.69                            | 1.0                      | 2.92                             | 1.0                       |
| PBST45 | 0.52                            | 1.3                      | 2.18                             | 1.3                       |

<sup>a</sup>: 1 barrer =  $10^{-10}\text{cm}^3\cdot\text{cm}/(\text{cm}^2\cdot\text{s}\cdot\text{cmHg})$ . <sup>b</sup>: Barrier improvement factor.

**Table S3.** Data for crystallinity calculation of PBST and PBAT film

| Sample | $\Delta H_m$ (J/g) <sup>a</sup> | $x_c$ (%) <sup>b</sup> | Source             |
|--------|---------------------------------|------------------------|--------------------|
| PBS    | -                               | 60.0                   | Ref. <sup>19</sup> |
| PBST23 | 25.50                           | 23.7                   | This work          |
| PBST33 | 22.37                           | 18.4                   | This work          |
| PBST44 | 14.37                           | 11.8                   | This work          |
| PBST61 | 21.24                           | 14.7                   | This work          |
| PBST71 | 24.61                           | 17.0                   | This work          |
| PBT    | -                               | 40.0                   | Ref. <sup>19</sup> |
| PBAT48 | 11.44                           | 10.0                   | This work          |

<sup>a</sup>:  $\Delta H_m$  is the melting enthalpy calculated from the first heating curve. <sup>b</sup>:  $x_c$  (%) =  $\Delta H_m / \Delta H_m^0$ ,  $\Delta H_m^0$  is the melting enthalpy of 100% crystalline polymers and copolymers (with similar composition),  $\Delta H_m^0$  of PBS, PBST23, PBST33, PBST44, PBST61, PBST71, PBT and PBAT48 are 110.5 J/g, 110.5 J/g, 121.4 J/g, 121.4 J/g, 144.5 J/g, 144.5 J/g, 144.5 J/g, 114 J/g, respectively, cited from ref. <sup>4, 19</sup>;  $x_c$  (crystallinity) of PBS and PBT are cited from ref. <sup>19</sup>.

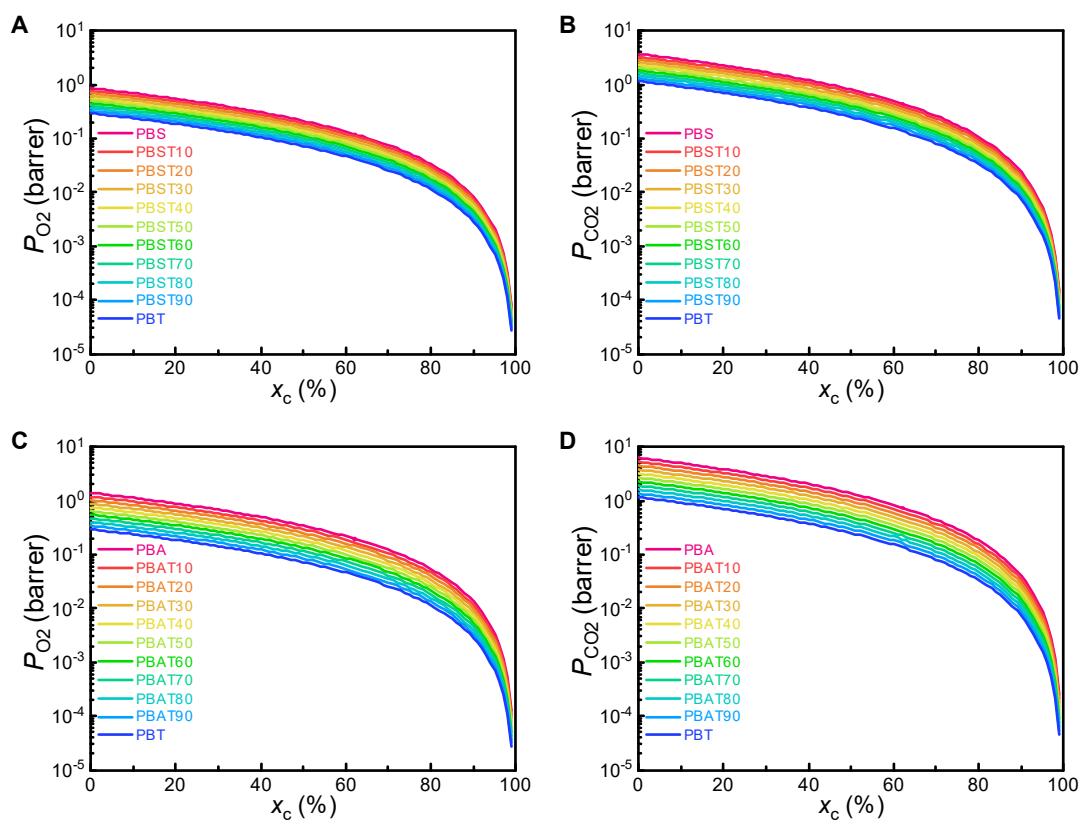**Figure S1.** Theoretically predicted gas permeability coefficients of PBSTs and PBATs in full range of composition and crystallinity.

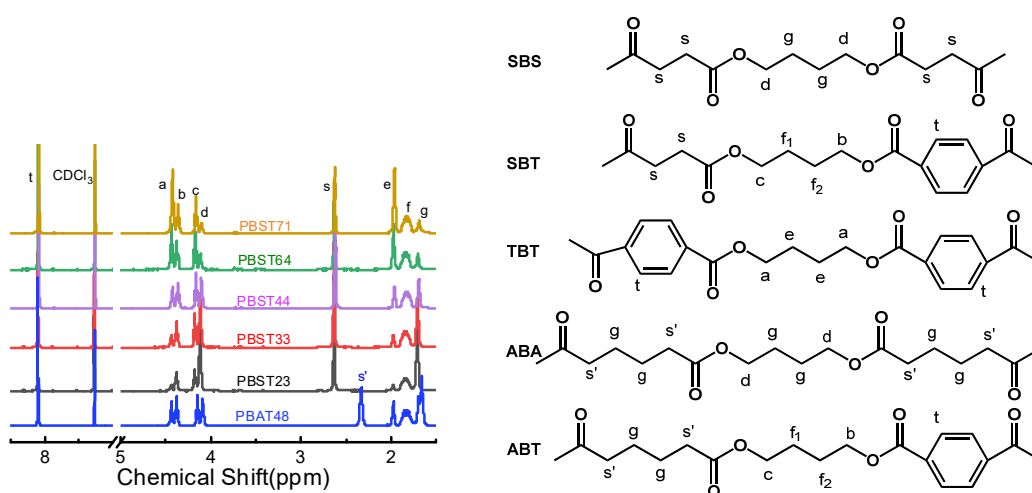

**Figure S2.**  $^1\text{H}$  NMR spectra (solvent:  $\text{CDCl}_3$ ) of PBST and PBAT copolyesters (left) and peak assignment (right).

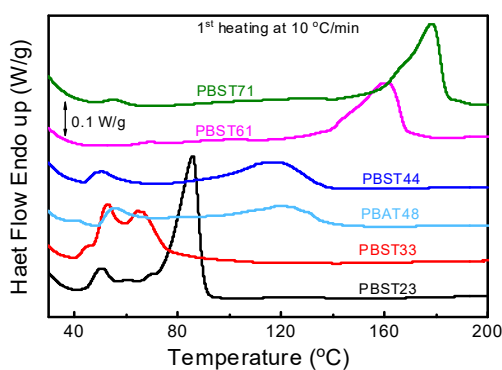

**Figure S3.** First heating DSC curve of various PBST and PBAT copolyesters.

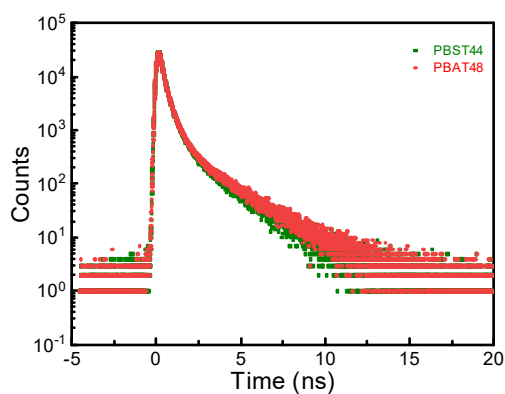

**Figure S4.** Positron annihilation lifetime spectroscopy (PALS) of PBST44 and PBAT48 copolyesters.

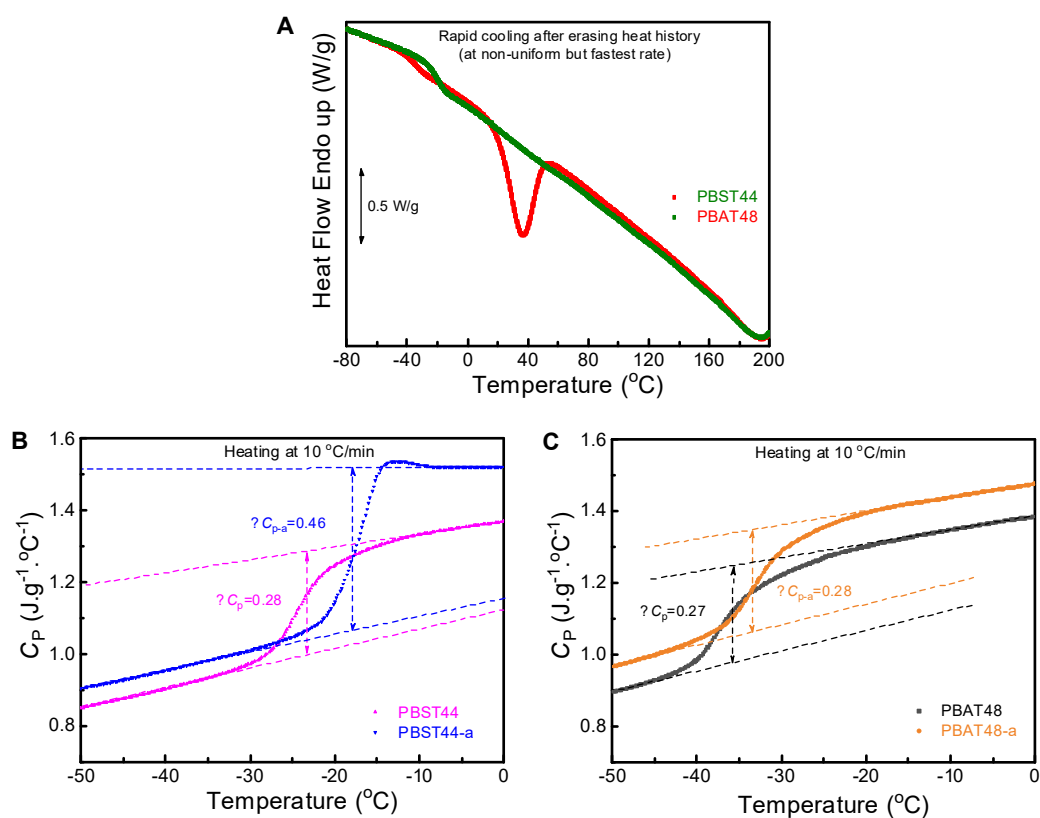

**Figure S5.** (A) Rapid cooling DSC curves of PBST44 (green) and PBAT48 (red) after erasing heat history; (B) Heat capacity vs. temperature cures around  $T_g$  of completely amorphous (blue) and semi-crystalline (pink, did not erase heat history) PBST44 samples; (C) Heat capacity vs. temperature cures around  $T_g$  of completely amorphous (orange) and semi-crystalline (black, did not erase heat history) PBAT48 samples.
